# Supplementary material
Source: publisher figshare collection journal article supplement (https://frontiersin.figshare.com/ndownloader/files/24012428)
Supplement: Supplementary file [file 24012428]

## Supplementary Material

**Supplementary Table S1.** Desolvation conditions and crosslinker amounts for each PNC type.

| PNC   | Crosslinker   | Crosslinker Reactive Group (Molar Excess) | Crosslinker Amount (mg) | Crosslinker Volume (μl) | DEE Volume (μl) | Reaction Time (min) |
|-------|---------------|-------------------------------------------|-------------------------|-------------------------|-----------------|---------------------|
| SLS-T | Tri-thiol     | 50                                        | 3.22                    | 2.66                    | 500             | 50                  |
| SLS-M | Tri-maleimide | 5                                         | 0.210                   | 21.0                    | 800             | 60                  |
| SLS-N | Tri-NHS       | 0.5                                       | 0.052                   | 5.20                    | 500             | 60                  |

**Supplementary Table S2.** Zetasizer Nano ZS dynamic light scattering measurement settings.

\*Based on starting peptide concentration

| Concentration (mg/ml)* | Resuspension Medium | Volume (μL) | Measurements Per Sample Run | Laser Wavelength (nm) | Scattering Angle (°) |
|------------------------|---------------------|-------------|-----------------------------|-----------------------|----------------------|
| 1                      | MQ Water            | 70          | 3                           | 633                   | 173                  |

| Cuvette Type | Measurement Temperature (°C) | Refractive Index (Particle) | Refractive Index (Medium) | Viscosity (cP) |
|--------------|------------------------------|-----------------------------|---------------------------|----------------|
| ZEN 0040     | 25                           | 1.45                        | 1.33                      | 0.8872         |

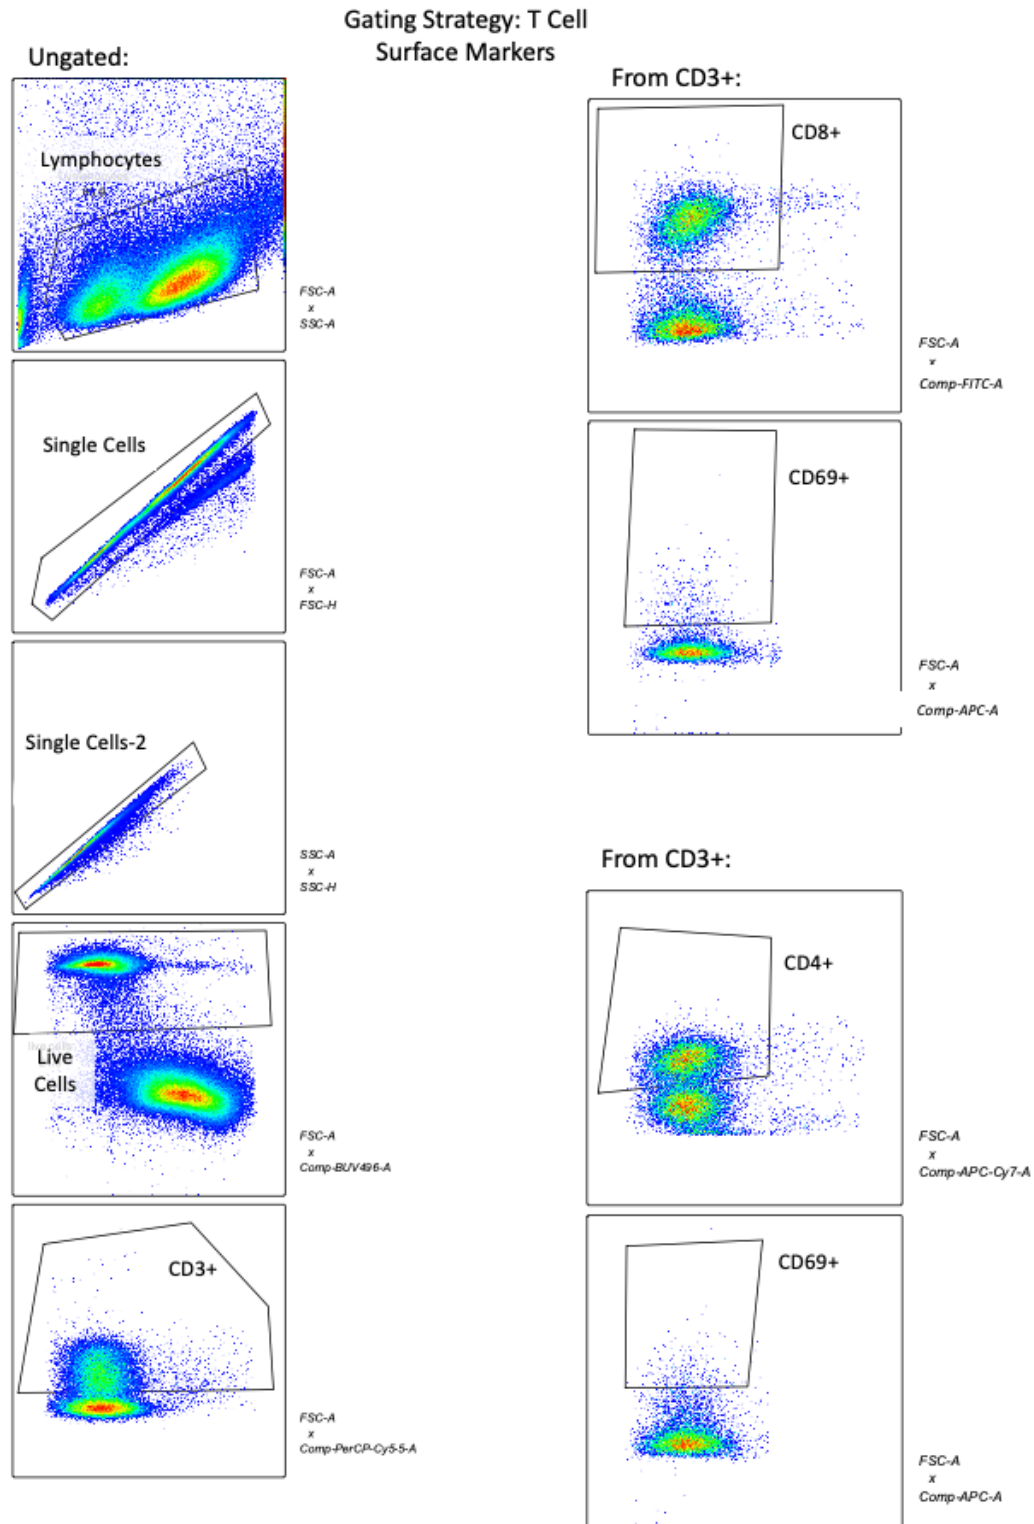

**Supplementary Figure S1.** Gating strategy used for quantifying T cells with CD69 surface marker expression.

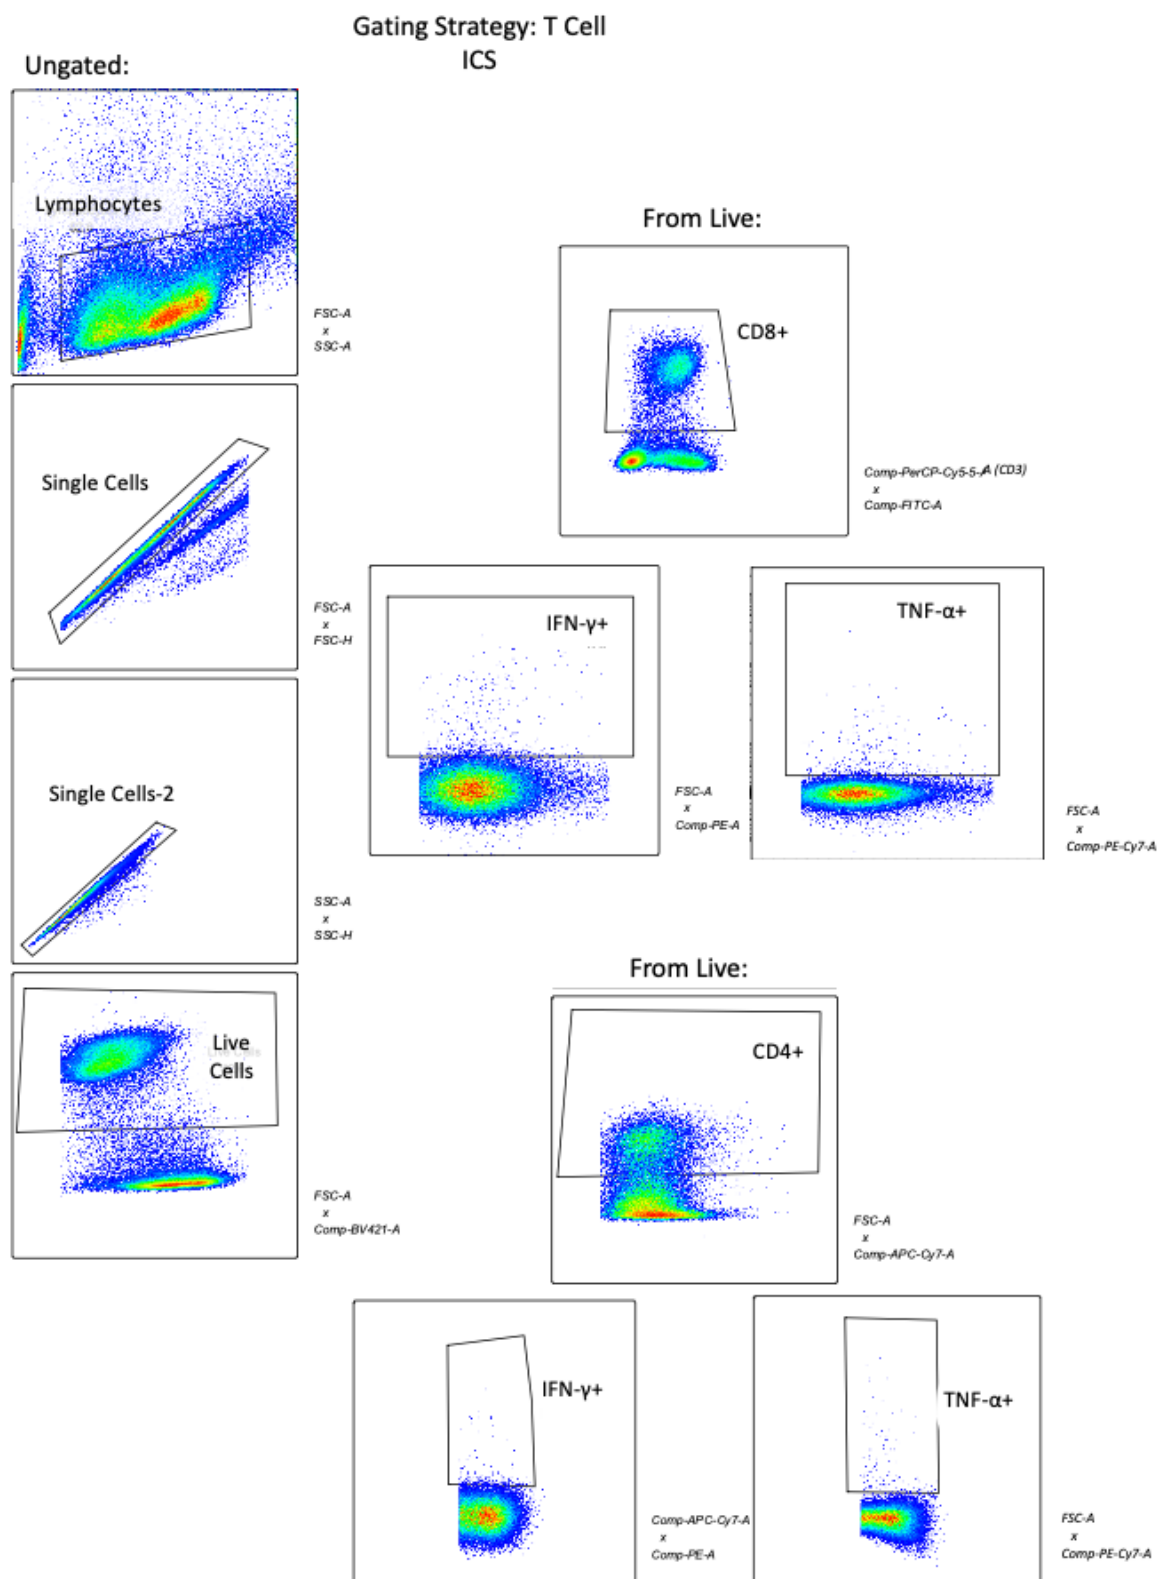

**Supplementary Figure S2.** Gating strategy used for quantifying T cells with IFN- $\gamma$  and TNF- $\alpha$  cytokine production.

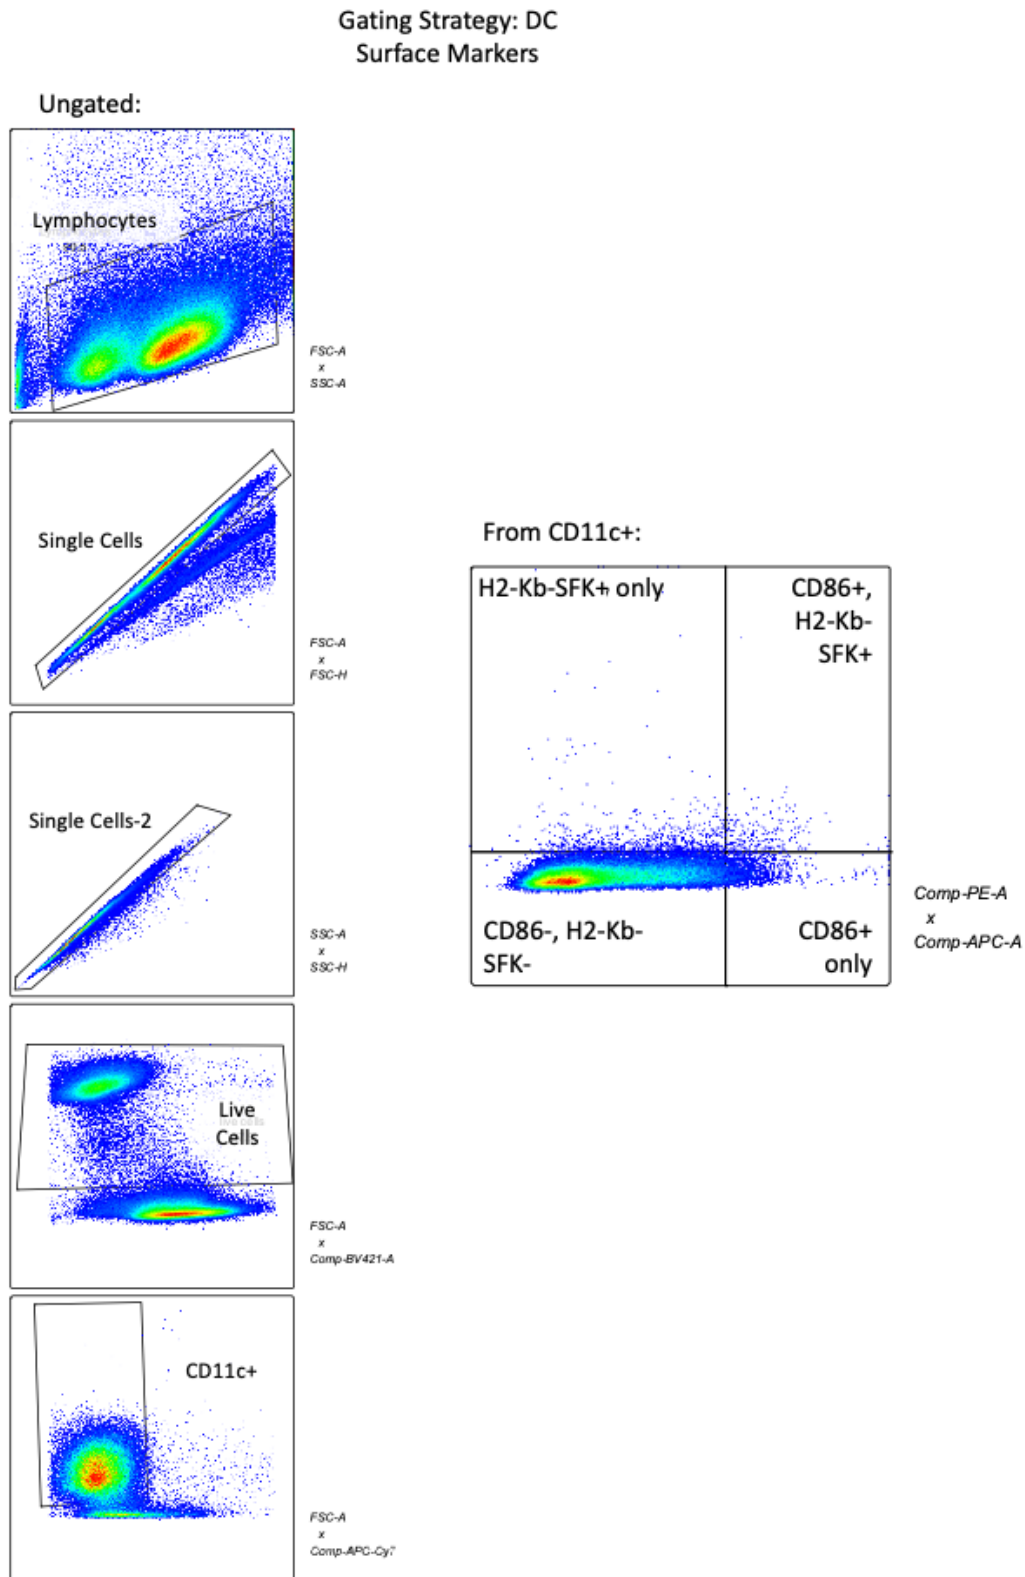

**Supplementary Figure S3.** Gating strategy used for quantifying DCs with CD86 surface marker expression and SIINFEKL presentation on the MHC I haplotype H2-K<sup>b</sup>.

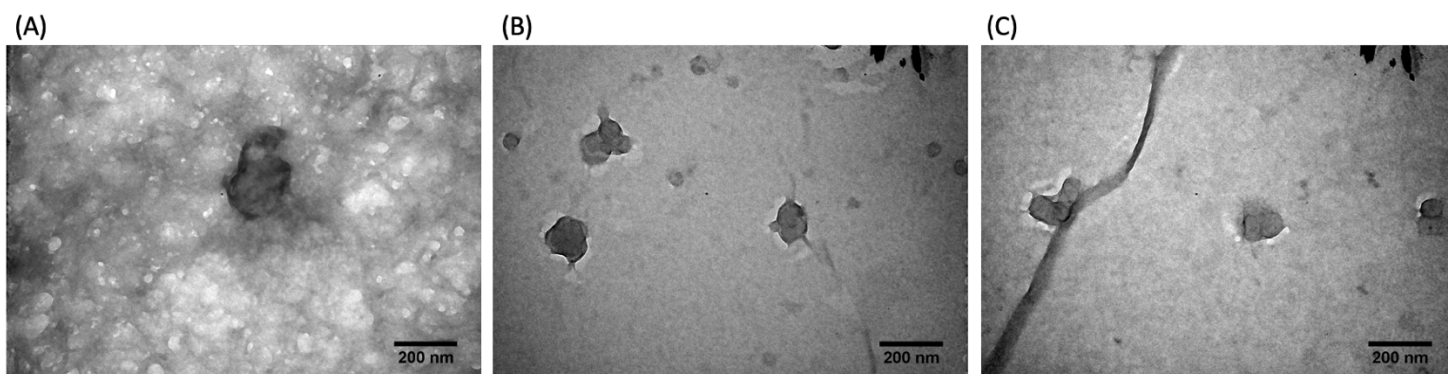

**Supplementary Figure S4.** TEM images of (A) SLS-T, (B) SLS-M, and (C) SLS-N PNC. Scale bars = 200 nm. Particles were dried on a TEM grid (Carbon Film 300 Mesh, Copper; Electron Microscopy Sciences) overnight. Dried PNC were stained with 1% phosphotungstic acid (PTA) for 15 seconds, washed twice with water, and dried again overnight before imaging using a JEOL 100 CX-II TEM.

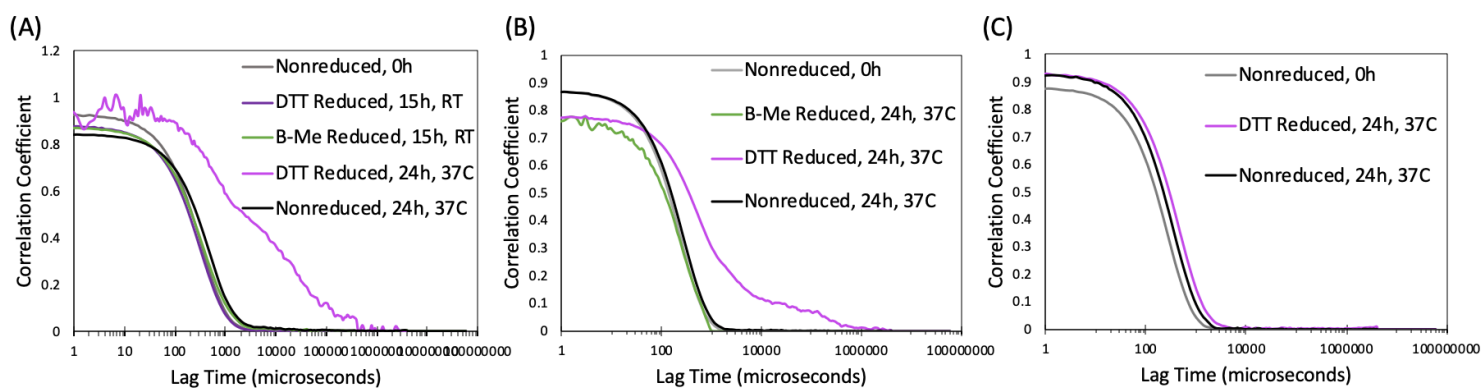

**Supplementary Figure S5.** (A) SLS-T, (B) SLS-M, and (C) SLS-N PNC breakup via reduction with 5% v/v  $\beta$ -mercaptoethanol (B-mE) or 100 mM dithiothreitol (DTT) at room temperature (RT) or 37 °C. Dynamic light scattering correlogram indicates intact particles for all measurements except when SLS-T or SLS-M particles are reduced with 100 mM DTT for 24 h at 37 °C, where correlogram displays poor quality particles with aggregation.

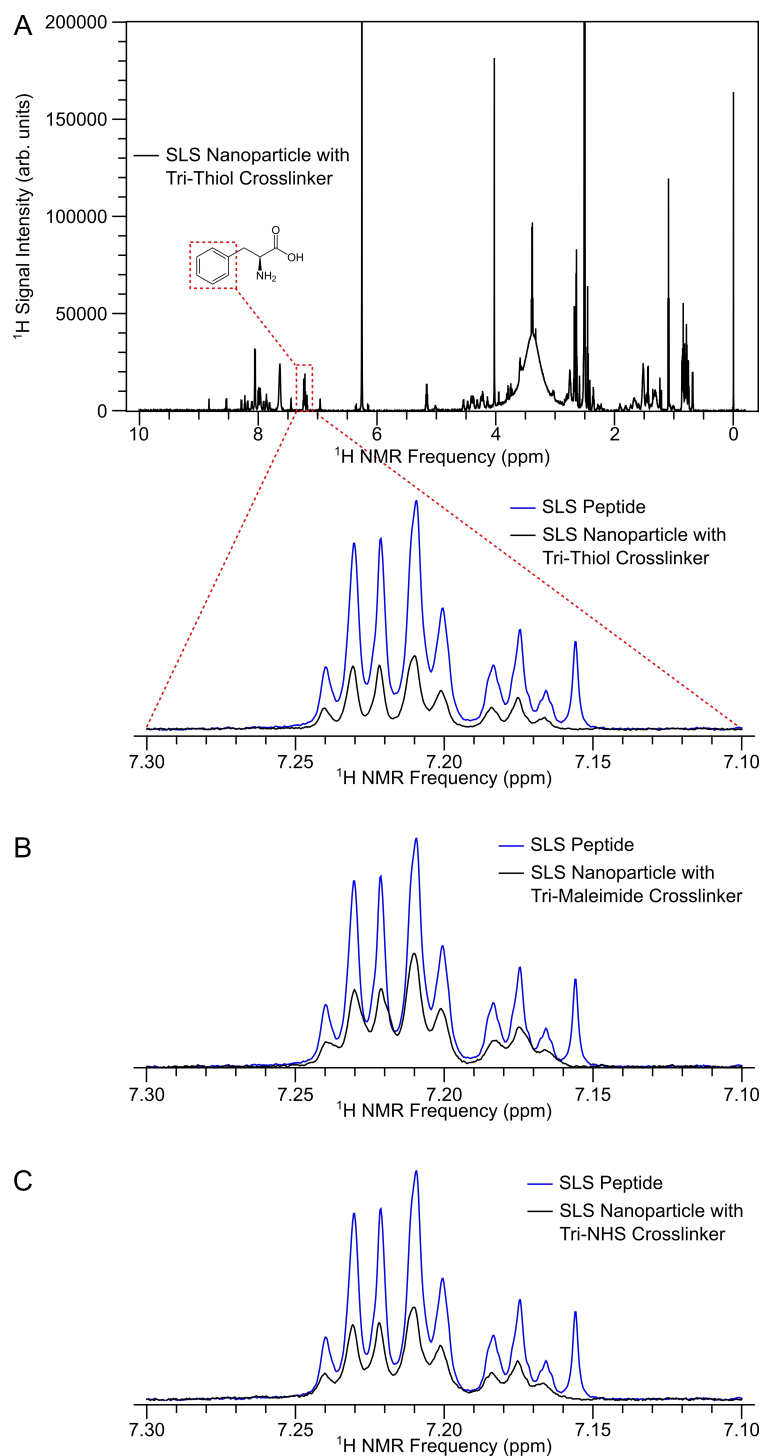

**Supplementary Figure S6.**  $^1\text{H}$  NMR spectra of SLS PNC resuspended in deuterated DMSO. (A) Full  $^1\text{H}$  NMR spectrum of SLS-T PNC with the aromatic protons of the phenylalanine sidechain highlighted in red. Below is a zoomed in overlay of the unassembled SLS peptide (blue) and SLS-T PNC (black) spectra focused on the phenylalanine sidechain region. (B,C) Overlay of the unassembled SLS peptide and (B) SLS-M and (C) SLS-N PNC spectra focused on the phenylalanine sidechain region.

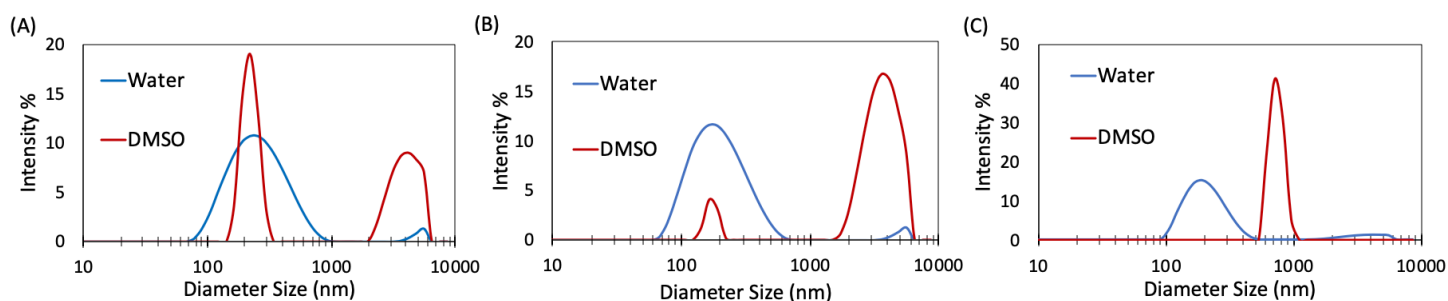

**Supplementary Figure S7.** Size distribution of (A) SLS-T, (B) SLS-M, and (C) SLS-N PNC measured by dynamic light scattering when suspended in water or DMSO. PNC increase in size when suspended in DMSO. Size increase indicates particle swelling, ensuring sufficient molecular mobility during  $^1\text{H}$  NMR analysis.

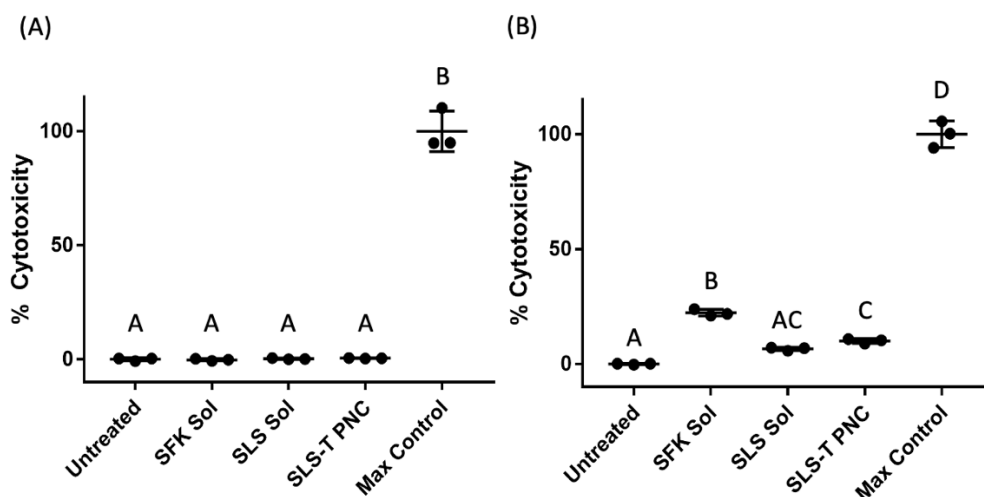

**Supplementary Figure S8.** Cytotoxicity of SIINFEKL, SLS, and SLS-T PNC in DC2.4 dendritic cell and B3Z T cell hybridomas. No toxicity was observed in DC cell line. Low levels of toxicity were observed with SLS-T PNC. However, higher toxicity was observed in soluble SIINFEKL than the SLS and SLS-T groups, despite being a very common antigen that is widely used *in vivo*. 100  $\mu\text{l}$ /well DCs (100,000 cell/ml) or T cells (100,000 cells/ml) were incubated with 25  $\mu\text{g}/\text{ml}$  peptide in soluble or PNC form in supplemented culture medium (RPMI 1640 + L-glutamine + 25 mM HEPES supplemented with 10% heat inactivated fetal bovine serum, 1% penicillin/streptomycin, 50  $\mu\text{M}$   $\beta$ -mercaptoethanol). After 24 h incubation, cytotoxicity was measured with an LDH Cytotoxicity Assay kit according to manufacturer protocol (Pierce; ThermoFisher). Maximum (Max) control was DC or T cell LDH production after 30 min incubation with 1X lysis buffer. 100% toxicity was determined from Max Control. N=3. Differences between letters show significant differences between samples ( $p < 0.01$ ). Samples that share the same letter are not statistically different from each other.

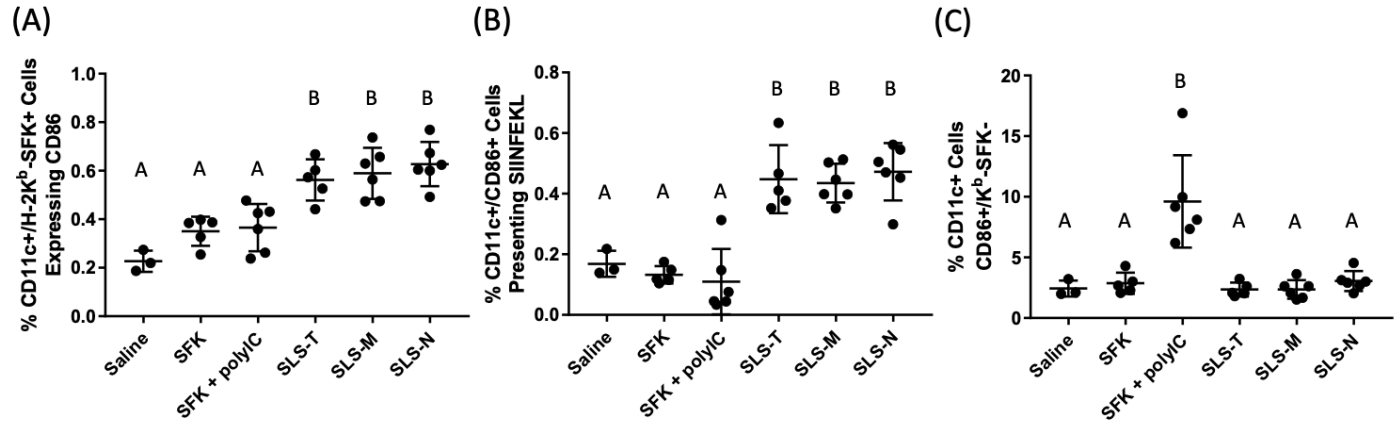

**Supplementary Figure S9.** (A) Percent of CD11c+/H-2K<sup>b</sup>-SFK+ DCs in axillary/brachial lymph nodes that also express CD86 maturation marker. (B) Percent of CD11c+/CD86+ maturing DCs in axillary/brachial lymph nodes that also present SIINFEKL. (C) Percent of CD11c+ DCs in axillary/brachial lymph nodes that are CD86+/H-2K<sup>b</sup>-SFK-. Of the DCs presenting SIINFEKL, only PNC induce significant maturation (CD86 expression). Similarly, of the CD86+ maturing DCs, only PNC groups showed a significant percentage of SIINFEKL presentation. Nonspecific maturation (CD86 expression) without SIINFEKL presentation occurs at high levels only in the poly(I:C) adjuvanted SIINFEKL group. N=5-6. Differences between letters show significant differences between samples ( $p < 0.05$ ). Samples that share the same letter are not statistically different from each other.

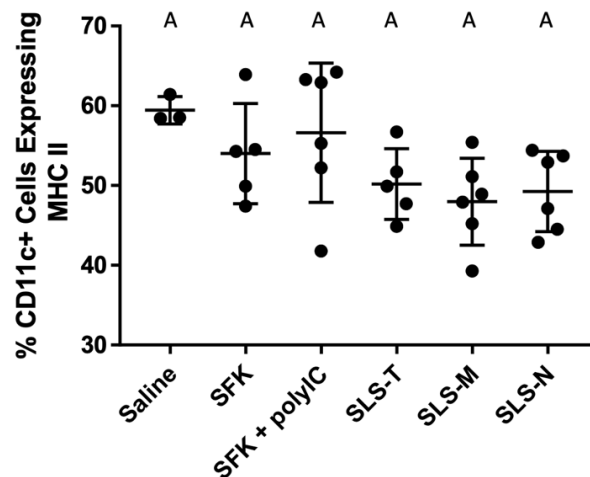

**Supplementary Figure S10.** Percent of CD11c+ cells in spleen expressing MHC II. N=5-6. Differences between letters show significant differences between samples ( $p < 0.05$ ). Samples that share the same letter are not statistically different from each other.



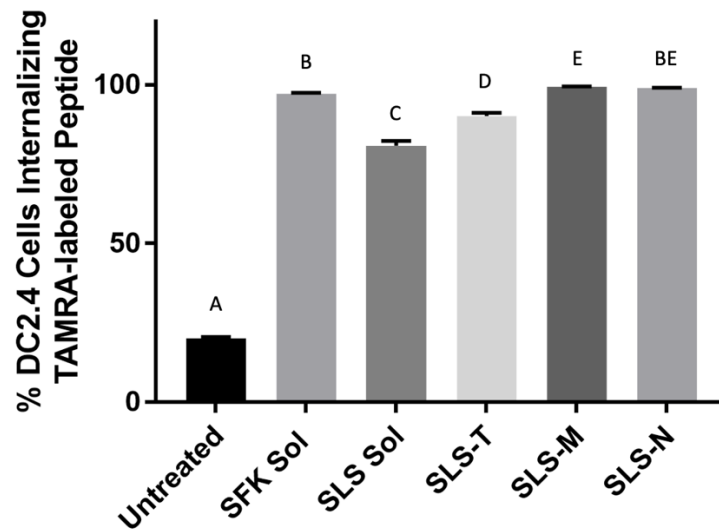

**Supplementary Figure S11.** DC2.4 dendritic cell line internalization of 10% TAMRA-labeled peptide in soluble and PNC form. All treatment groups displayed significant uptake. Increased uptake of soluble SIINFEKL peptide could be due to aggregation of TAMRA-labelled SIINFEKL in aqueous media, which did not occur for TAMRA-labelled SLS. Slight differences in PNC uptake may reflect differences in PNCs detectable by cells, or slight variations in the efficiency of TAMRA-labelled SLS incorporation in PNCs. 50,000 DC2.4 cells/well were seeded in a 96 well V-bottom plate in culture medium (RPMI 1640 + L-glutamine + 25 mM HEPES supplemented with 10% heat inactivated fetal bovine serum, 1% penicillin/streptomycin, 50  $\mu$ M  $\beta$ -mercaptoethanol). For 24 h at 37 °C and 5% CO<sub>2</sub>, DCs were incubated with 25  $\mu$ g/ml of the indicated antigen formulation with 10% of the peptide TAMRA-labelled. Cells were centrifuged in the plate at 300 g for 5 mins, washed once with 100  $\mu$ l acid wash (0.2 M glycine, 0.15 M NaCl, pH 3.1), washed twice with 100  $\mu$ l PBS, and resuspended in 200  $\mu$ l 1% BSA in PBS for analysis. Flow cytometry was performed with Beckman Coulter CytoFLEX and collected 5000 cells/well. N=3. Differences between letters show significant differences between samples ( $p < 0.05$ ). Samples that share the same letter are not statistically different from each other.
